# 1 The evolutionary origins of primate scleral coloration

2 Alex S. Mearing<sup>1\*</sup>, Judith M. Burkart<sup>2</sup>, Jacob Dunn<sup>1,3,4</sup>, Sally E. Street<sup>5</sup> & Kathelijne Koops<sup>1,2</sup>

3

4 <sup>1</sup>Department of Archaeology, Fitzwilliam Street, University of Cambridge, Cambridge, CB2 1QH,  
5 United Kingdom

6 <sup>2</sup>Department of Anthropology, University of Zurich, Zurich, 8057, Switzerland

7 <sup>3</sup>School of Life Sciences, Anglia Ruskin University, Cambridge, CB1 1PT, United Kingdom

8 <sup>4</sup>Department of Cognitive Biology, University of Vienna, Vienna, 1090, Austria

9 <sup>5</sup>Department of Anthropology, University of Durham, Durham, DH1 3LE, United Kingdom

10 \*Corresponding author: A.S. Mearing (alexmearing@live.co.uk)

11

## 12 **Abstract**

13 Primate gaze following behaviors are of great interest to evolutionary scientists studying social  
14 cognition. The ability of an organism to determine a conspecific's likely intentions from their gaze  
15 direction may confer an advantage to individuals in a social group. This advantage could be  
16 cooperative and/or competitive. Humans are unusual in possessing depigmented sclerae  
17 whereas most other extant primates, including the closely related chimpanzee, possess dark  
18 scleral pigment. The origins of divergent scleral morphologies are currently unclear, though  
19 human white sclerae are often assumed to underlie our hyper-cooperative behaviors. Here, we  
20 use phylogenetic generalized least squares (PGLS) analyses with previously generated species-  
21 level scores of proactive prosociality, social tolerance (both n=15 primate species), and  
22 conspecific lethal aggression (n=108 primate species) to provide the first quantitative,  
23 comparative test of three complementary hypotheses. The cooperative eye [M. Tomasello, B.  
24 Hare, H. Lehmann, J. Call, *J. Hum. Evol.* 52, 314–320 (2007)] and self-domestication [B. Hare,  
25 *Annu. Rev. Psychol.* 68, 155-186 (2017)] explanations predict white sclerae to be associated with  
26 cooperative, rather than competitive, environments. The gaze camouflage hypothesis [H.  
27 Kobayashi, S. Kohshima, *J. Hum. Evol.* 40, 419-435 (2001)] predicts that dark scleral pigment  
28 functions as gaze direction camouflage in competitive social environments. We show that white  
29 sclerae in primates are associated with increased cooperative behaviors whereas dark sclerae  
30 are associated with reduced cooperative behaviors and increased intra-specific lethal aggression.  
31 Our results lend support to all three hypotheses of scleral evolution, suggesting that primate  
32 scleral morphologies evolve in relation to variation in social environment.

33 **Main Text**

34

35 **Introduction**

36

37 The primate order contains a remarkable amount of variation in external ocular morphology  
38 (**Figure 1**), including differences in scleral volume, width-height ratios and pigment profiles (1-7).  
39 The former two measurements have been linked in phylogenetic comparative analyses to social  
40 (i.e., group size and neocortex ratio), ecological (i.e., habitat use) and life history (i.e., body mass)  
41 drivers (3). However, to our knowledge, no comparative quantitative study has yet examined the  
42 relationship between ocular pigment and social behavior across primate species. Humans are  
43 often considered to possess unique ocular configurations (1-3, 6-7). We possess especially large  
44 width to height ratios, especially large scleral volumes (1-4) and white, depigmented sclerae (1-2,  
45 5-7). Contrastingly, most non-human primate species (hereafter 'primates'), including the closely  
46 related chimpanzee, instead synthesize dark scleral pigment (1-2, 6-7). Interestingly, the equally  
47 closely related bonobo possesses sclerae of an intermediate average brightness between  
48 humans and chimpanzees (5).

49

50 The 'cooperative eye hypothesis' (6), suggests that the human depigmented sclera functions to  
51 facilitate hyper-cooperative behaviors (2, 6, 8) through, for example, the establishment of joint  
52 attentional states. That is, the ability of two or more individuals to jointly focus on one object or  
53 concept (6). A cooperation experiment, for example, found that participants who could view their  
54 partner's gaze were better able to communicate referential meaning (about both the current and  
55 required location of objects) than where their gazes were obscured (9). A white background may  
56 signal iridal direction more conspicuously and in a manner that is more difficult to conceal than  
57 would a dark background (6, 10). Other primates can also follow conspecific gaze direction (11-  
58 14), but it is not yet clear whether they can follow gaze with a similar aptitude as humans. Only  
59 humans, for example, prioritize the use of eye direction over head direction when following a  
60 conspecific's gaze (7). Humans can also determine conspecific iridal direction from a distance of  
61 up to 15 meters, though this may be partially mediated by the eyebrows (15). The cooperative  
62 eye hypothesis proposes that both the unusually depigmented human sclera and the potentially  
63 unusual sophistication of human gaze following could be associated with directional selection for  
64 cooperation.

65

66 Alternatively, the 'self-domestication hypothesis' posits that white sclerae may be pigment-related  
67 by-products associated with the human self-domestication process (7). Selection for tolerance  
68 and against aggression is predicted to result in the reduction in number and migration velocity of  
69 neural crest cells in early embryogenesis. This alteration may be responsible for domestication-  
70 syndrome - a range of behavioral and morphological traits that co-emerge with docility (16).

71 Pigment-producing melanocytes are derived from neural crest cells, so the reduction of  
72 melanocytes in a pale sclera (7) is potentially explicable as a correlated by-product of selection  
73 for social tolerance rather than as an explicitly functional adaptation.

74

75 The hypotheses describe above focus on the evolution of the human ocular morphology and the  
76 supposed uniqueness of human white sclerae. However, gaze cues are used widely in the  
77 primate order (e.g., gaze following or aversion; 11-14, 17). The 'gaze camouflage hypothesis',  
78 proposes that dark scleral pigment in primates may function as gaze direction camouflage from  
79 competitive conspecifics and predators (2). The ability to observe a conspecific's gaze direction  
80 and, using that information and context, to learn about the emotional and/or intentional state of  
81 others may be a useful skill for organisms living within a social group (18-19). However, the act of  
82 observing another's gaze direction may produce a source of information conflict. For instance,  
83 although it may be useful to third-party onlookers to receive social information (intentionally  
84 signaled or otherwise) as to one's emotional and/or intentional states, it is not necessarily  
85 advantageous to the individual themselves to be sharing such information indiscriminately since  
86 this could be adversely utilized by competitors. For example, an experiment has been reported in  
87 which the location of food is revealed to a chimpanzee (witness), with another chimpanzee  
88 (witness-of-witness) unable to see the food's location but able to observe the witness. The  
89 witness, potentially aware of having been observed, repeatedly misled the witness-of-witness by  
90 leading him to empty containers (20). Similarly, chimpanzees have been observed to avert their  
91 gaze from a high value food item if they, alone, are knowledgeable about its location and are in  
92 the presence of a dominant conspecific (17). These examples illustrate that communicating one's  
93 visual direction conspicuously and/or indiscriminately may not always be an optimal social  
94 strategy.

95

96 Here, we utilize the remarkable diversity of primate ocular morphologies to provide the first  
97 quantitative, comparative investigation of the role of sociality in primate scleral color evolution.  
98 We compare scleral brightness with three behavioral measures: 'proactive prosociality', 'social  
99 tolerance', and 'conspecific lethal violence'. Prosociality refers to any behavior which benefits  
100 another organism but where the originator does not benefit themselves (21). Prosociality can be  
101 reactive, e.g., in response to help-calls or subtle coercion (22), or proactive, that is, unsolicited  
102 (21). In humans, our heightened prosociality is considered to have facilitated the emergence of  
103 interdependent groups (23) as well as cumulative culture and technology (8). A previous report  
104 found the degree of allomaternal care to best predict observed patterns of proactive prosociality  
105 in primates, suggesting that increased prosocial tendencies may emerge with cooperative  
106 breeding systems (8). Social tolerance, that is, the tolerance towards groupmates and their

107 interests, is not prosocial, but equally is also non-competitive. Meanwhile, competitive behaviors  
108 such as lethal violence are often similarly adaptive social strategies (24) as they may relate to  
109 territory or resource control (25) and can be flexible and coalitionary in format (26). These three  
110 measures enable the examination of the evolutionary role of scleral pigment across different  
111 social environment. Proactive prosociality is indicative of highly cooperative environments, social  
112 tolerance represents a behavior of intermediate social value and, by contrast, conspecific lethal  
113 violence is indicative of highly competitive social environments.

114

115 Under the gaze camouflage hypothesis, we therefore predict heightened conspecific lethal  
116 aggression to predict darker sclerae, and for dark sclerae to be likewise associated with low  
117 values of proactive prosociality and social tolerance. Both the cooperative eye hypothesis  
118 (directional selection) and the self-domestication hypothesis (correlated by-product) predict white  
119 sclerae to be associated with heightened proactive prosociality, although the self-domestication  
120 hypothesis explains the presence of prosociality as a correlated by-product of selection for social  
121 tolerance (8, 27-28). Hence, an association between scleral brightness and proactive prosociality,  
122 but not social tolerance, could be taken as evidence against the self-domestication hypothesis.

123

## 124 **Results**

125

### 126 **Proactive Prosociality**

127

128 Log (Scleral brightness) was significantly positively associated with sqrt (proactive prosociality)  
129 scores across the 15 primate species. Where lambda was taken at its maximum likelihood  
130 ( $\lambda_{ML}=0$ ), a statistically significant relationship was observed ( $p= < 0.001$ ,  $R^2=0.711$ ,  
131 estimate=0.085,  $t=5.66$ ; **Figure 2**). Similarly, where lambda was assumed to equal 1, a highly  
132 conservative comparison, the statistically significant relationship was still observed ( $p= < 0.001$ ,  
133  $R^2=0.723$ , estimate=0.083,  $t=5.83$ ).

134

### 135 **Social Tolerance**

136 Scleral brightness was significantly positively associated with social tolerance scores across the  
137 15 primate species. Where lambda equals its maximum likelihood ( $\lambda_{ML}=0$ ), a significant  
138 relationship was observed ( $p=0.047$ ,  $R^2=0.269$ , estimate=90.58,  $t=2.19$ ; **Figure 3**). Likewise,  
139 where weighted by lambda=1, the positive association between scleral brightness and social  
140 tolerance is still statistically significant ( $p=0.03$ ,  $R^2=0.314$ , estimate=95.57,  $t=2.44$ ).

141

### 142 **Conspecific Lethal Violence**

143 A significant negative association was observed across the 108 primate species between log  
144 (scleral brightness) and sqrt (conspecific lethal violence). Where lambda was taken at its

145 maximum likelihood ( $\lambda_{ML}=0.698$ ), a statistically significant observation was observed ( $p < 0.001$ ,  
146  $R^2=0.118$ , estimate=-0.088,  $t=-3.77$ ; **Figure 4**). Similarly, where lambda was assumed to equal 1,  
147 a statistically significantly relationship was still observed ( $p < 0.001$ ,  $R^2=0.306$ , estimate=-0.144,  
148  $t=-6.84$ ).

149

## 150 **Discussion**

151

152 Our findings provide broad support for all three hypotheses tested: the gaze camouflage,  
153 cooperative eye and self-domestication hypotheses. We show that scleral pigmentation varies  
154 with differences in social behaviors between species of extant primates. Proactive prosociality, an  
155 experimentally derived measure of the degree to which individuals were willing to help their  
156 groupmates with no possibility of directly benefitting themselves, was associated with significantly  
157 increased scleral brightness (white sclerae being depigmented). Social tolerance, a measure of  
158 the evenness of the distribution of food items in the same species, was also associated with  
159 increased scleral brightness, though based on p-values and coefficients of determination ( $R^2$ )  
160 appears to be a weaker predictor than proactive prosociality. Scleral brightness was significantly  
161 negatively associated with the percentage of deaths attributable to conspecific lethal aggression.

162

163 The presence of scleral pigmentation is likely to be a functional adaptation, rather than a product  
164 of random drift, due to the metabolic cost incurred in synthesizing dark pigment (2, 7). That the  
165 extent of conspecific lethal violence negatively predicts scleral brightness (i.e., predicts darker,  
166 more pigmented sclerae), may indicate that scleral pigment functions as a mechanism of gaze  
167 camouflage to conspecifics and/or predators (2). Chimpanzees, who are considered more  
168 reactively aggressive and less cooperative than humans and bonobos (7, 27), and who likewise  
169 possess significantly darker sclerae (5), have been shown to use visual concealment (29) and  
170 gaze aversion (17) when engaged in food competition. The presence of pigment could confer an  
171 advantage in terms of concealing gaze direction from groupmates and/or predators (though the  
172 latter was not tested here) in a competitive context (2). The fact that we have observed this  
173 relationship across the primate order is consistent with the conclusion that gaze following  
174 behaviors are widespread beyond the immediate hominid family (12).

175

176 Similarly, the presence of increased scleral brightness could also be adaptive – a position  
177 consistent with the cooperative eye hypothesis. Our results indicate that increased scleral  
178 brightness is associated with increased cooperative behaviors and reduced lethal violence. This  
179 finding is consistent with several previous studies. For example, a previous report found the  
180 degree of allomaternal care to best predict variation in proactive prosociality, arguing that this  
181 behavior may emerge with cooperative breeding systems (8). Additionally, alloparental care

182 frequencies have been linked to neural control of facial musculature in primates (30), suggesting  
183 that the proper conveyance of non-verbal signals is of increased importance in cooperative  
184 breeding species. Furthermore, common marmosets (*Callithrix jacchus*), but not capuchin (*Cebus*  
185 *apella*) or tonkean monkeys (*Macaca tonkeana*), have been shown to share direct gaze when  
186 working on cooperative tasks that may be ambiguous (31-32). Of interest, these studies are also  
187 consistent with our finding that the four brightest species' sclerae across our sample are found  
188 among humans and cooperative breeders: common marmosets (*Callithrix jacchus*), Goeldi's  
189 marmosets (*Callimico goeldii*), humans and cotton-top tamarins (*Saguinus oedipus*). This finding  
190 is contrary to a commonly held belief that white sclerae are a uniquely human morphology (1-2, 6-  
191 7).

192

193 Alternatively, it may be that white sclera simply represent the absence of pigment which is  
194 synthesized only for use in competitive environments or, alternatively, could be by-products  
195 associated with self-domestication processes (7, 28). The self-domestication hypothesis predicts  
196 that selection for social tolerance, and against aggression, may generate prosocial behavior as a  
197 correlated by-product (27-28). Therefore, our finding that social tolerance, in addition to proactive  
198 prosociality, significantly predicts scleral brightness is consistent with the self-domestication  
199 perspective. However, we therefore cannot differentiate between self-domestication and  
200 cooperative eye explanations at this time. Furthermore, these may not be mutually exclusive  
201 perspectives. It could be, as an example, that white sclerae originated as a correlated by-product  
202 of self-domestication processes but subsequently became the subject of directional selection,  
203 thereby increasing fitness, as neural bases for social cue recognition have developed around this  
204 morphology (see 33).

205

206 These results provide a potential function and/or origin of divergent scleral morphologies and  
207 affirm that differences in scleral morphology are associated with differences in species' social  
208 behavior. Recently, an investigation using relative measures (i.e., producing a ratio of the  
209 brightness contrast between the iris and sclera) found humans, bonobos and chimpanzees to  
210 have comparable, not distinct, gaze conspicuousness, despite their different scleral morphologies  
211 (5). This methodology, however, produces contrast ratios which may not be appropriate for large  
212 scale comparisons and which do not account for the physical properties of visible light that may  
213 bias the naturalistic perception of shade (34). Our results refute these findings and show that  
214 differences in primate scleral colorations are explicable with divergent social behaviors, indicating  
215 that the naturalistic perception of shade cannot be adequately captured with relative  
216 methodologies alone (34).

217

218 The sample sizes for the behavioral measures proactive prosociality and social tolerance may be  
219 considered small (both  $n=15$ ). However, both represent the high amount of labor, hours and  
220 logistics required to experimentally extract these data (8). These behavioral data enable a deeper  
221 analysis than the use of common sociality proxies such as social group size. For example, many  
222 species, such as humans, chimpanzees and bonobos, live in large social groups (3) but differ  
223 widely in the social behaviors that are associated with ocular morphologies (7; 27). The use of  
224 such species-level behavioral proxies are therefore more appropriate, though the smaller sample  
225 size (and the use of different species within datasets) does exclude the possibility of multiple  
226 regression techniques. Likewise, the use of conspecific lethal violence data (35) acts as a useful  
227 indicator of a species' aggressiveness. That said, the original compilation method did not  
228 separate between inter- and intra-group aggression, infanticide or maternal abandonment,  
229 behaviors that likely have different neural and functional bases (27) and which may exert different  
230 influences on scleral morphology. This may explain the weaker model fit in the conspecific lethal  
231 violence regression.

232

233 A limitation relates to the lighting properties of online photographs. Quantitative analyses of color  
234 from digital photographs often require photographs to be taken in controlled settings and/or with  
235 the use of a color standard for calibration (36). This is not possible when analyzing existing,  
236 uncalibrated photographs, however, this is less relevant when exclusively analyzing brightness  
237 rather than the additional hue and saturation values that comprise the full perception of color  
238 (rather than shade alone) from digital sources (34, 37). Although the ambient brightness of the  
239 photo represents a minor source of unaccounted variation, this is mitigated by the use of multiple  
240 distinct photos per species (minimum 6) with the majority of photos (97.6%) containing both eyes  
241 per individual for further average calculations. In this respect, we follow a previously established  
242 data collection methodology (5, 37). Furthermore, this approach, rather than a laboratory-based  
243 analysis, relates more closely to the naturalistic perception of ocular morphologies by onlookers  
244 since primates will continue to interact with conspecifics across a range of locations and times  
245 with different ambient shades. Hence, this enables more ecologically valid testing of the function  
246 of sclerae in relation to social interactions and allows us to examine a much larger dataset than  
247 would otherwise be possible.

248

249 In sum, we provide the first quantitative comparative analysis of the relationship between  
250 primate ocular pigment and social behavior. Human white eyes have long been a mystery by  
251 comparison to the dark scleral phenotypes observed among primates. Here, we show that pale  
252 scleral color is associated with cooperation whereas dark scleral color is associated with reduced  
253 cooperation and increased lethal aggression in extant primates. This refutes the recent notion

254 that gaze conspicuousness be considered comparable, not distinct, between humans and *Pan*  
255 and lends support to the cooperative eye, self-domestication and gaze camouflage hypotheses of  
256 eye-behavior co-evolution.

257

## 258 **Materials and Methods**

259

260 We obtained species-level scores of proactive prosociality and social tolerance across 15 extant  
261 primate species from (8). Full methodological details can be found with the original paper. In brief,  
262 the authors used a group service apparatus (38) to measure proactive prosociality and social  
263 tolerance. Captive primates were habituated to the apparatus and taught the function of an  
264 accessible lever which moved a board containing food into reach. Food was placed on the board  
265 in two positions - one where the individual pulling the lever could reach the food themselves and  
266 another where the individual pulling the lever could not reach the food themselves, but could  
267 make the food accessible to their group-mates. The resultant data are comparable between  
268 groups and species due to the standardization of this procedure. Proactive prosociality measured  
269 how many items of food an individual made available to their groupmates that they themselves  
270 could not access. Social tolerance was quantified where the board was in a fixed position with the  
271 food accessible and repeatedly replenished (35 times) as it was eaten. The authors then  
272 measured the evenness of the distribution of food items within the group to produce social  
273 tolerance scores. Lastly, conspecific lethal aggression was scored as the percentage of deaths  
274 per species (study populations are taken to be representative of each species) that were  
275 attributable to conspecific lethal aggression obtained from published data for 108 extant primate  
276 species (35).

277

278 We collected primate facial images from an online google image search completed in February  
279 2021 and which used the common species name and the word “face” as key words. Some  
280 chimpanzee and bonobo images were collected from a previous study (5) and the Royal Burgers’  
281 Zoo, Netherlands. Human images are public domain and were collected from the Pexels.com  
282 database using the key words “man”, “woman”, “face” and “eyes”. We then analyzed scleral  
283 brightness using ImageJ 1.x (39). Images were selected from this search to ensure the resolution  
284 of the external eye was of sufficient quality, that the eyes were unobscured by other objects and  
285 that there was no apparent photo manipulation present. Images were converted to greyscale  
286 such that the value of each pixel varied from 0 (black) to 255 (white) with intermediate scores  
287 being corresponding shades of grey. We then extracted scleral brightness values following  
288 existing techniques (5, 37). We collected values from within a rectangular selection area placed  
289 on the visible sclera for each eye per photo. A minimum of six photos were collected per species,  
290 although it is not known whether these represent six distinct individuals in all cases. We then



291 calculated the median pixel value per selection area (due to the potential for outliers such as poor  
292 lighting, camera quality or light reflections) and the mean value per individual (i.e., mean of both  
293 eyes/selection areas), and subsequently the mean scleral brightness value per species. Of the  
294 944 total facial photos, 21 (2.2%) presented with a cranial angle from which only 1 eye was  
295 clearly visible. In these few cases, the one accessible eye was taken to be representative of the  
296 scleral brightness of that individual. Species which were documented by (35), but for which  
297 insufficient number or quality of facial photos was available from online materials or which were  
298 not uniquely represented in the GenBank taxonomy were not included in analyses but are listed  
299 (see supplementary **Table S1**).

300

301 Phylogenetic generalized least squares analysis (PGLS) was completed in R version 4.0.3. (40)  
302 using the 'caper' package version 1.0.1. (41). A consensus phylogeny with branch lengths  
303 proportional to time (i.e., a chronogram) was generated and pruned for use from 10ktrees.com  
304 version 3 (42) and used the GenBank taxonomy (43). Variables were log transformed where  
305 residuals were non-normally distributed or to improve linearity. Where a variable contained zero-  
306 values, it was instead square root transformed as, unlike with log transformations, this does not  
307 require the input of an arbitrary constant which influences goodness-of-fit (44). Diagnostic plots  
308 including Q-Q, density and fitted and residual value plots were generated and inspected using the  
309 'plot.pgls' function in the 'caper' package (41). Residual normality was further established using  
310 Shapiro-Wilk tests on model residuals. The significance value (i.e., alpha) is placed at 0.05. We  
311 estimated phylogenetic signal in PGLS analyses using Pagel's  $\lambda$ , which indicates the degree to  
312 which the co-variance in model residuals is proportional to shared evolutionary history between  
313 species, assuming a Brownian motion model of evolutionary change over time (45-46).  $\lambda$  varies  
314 from 0 to 1, where 0 indicates that species are independent of one another and 1 the maximum  
315 level of phylogenetic signal, i.e., that co-variances are directly proportional to shared evolutionary  
316 history (45-46). Estimates of the maximum likelihood of lambda were subject to wide confidence  
317 intervals, a limitation increasingly common with reduced sample sizes (47) (likelihood profiles with  
318 confidence intervals are given in supplementary materials; **figures S1-S3**). For this reason, and  
319 to present a full picture of results, two result statements are provided per statistical test: one  
320 where lambda is assumed to equal its maximum likelihood ( $\lambda_{ML}$ ) and one where lambda is taken  
321 to equal 1 (the strictest phylogenetic control). The latter approach is highly conservative as higher  
322 phylogenetic control typically reduces the significance of independent variables (48).

323

## 324 **Acknowledgments**

325

326 We would like Prof. Richard Wrangham for his comments on an earlier draft and the Royal  
327 Burgers' Zoo, Netherlands for providing photo data.

328

329

## References

330

331

332

333

334

335

336

337

338

339

340

341

342

343

344

345

346

347

348

349

350

351

352

353

354

355

356

357

358

359

360

361

362

363

364

365

366

367

368

369

370

371

372

373

1. H. Kobayashi, S. Kohshima, Unique morphology of the human eye. *Nature* 387, 767-768 (1997).
2. H. Kobayashi, S. Kohshima, Unique morphology of the human eye and its adaptive meaning: comparative studies on external morphology of the primate eye. *J. Hum. Evol.* 40, 419-435 (2001).
3. H. Kobayashi, K. Hashiya, The gaze that grooms: contribution of social factors to the evolution of primate eye morphology. *Evol. Hum. Behav.* 32, 157-165 (2011).
4. J.A. Mayhew, J.C. Gómez, Gorillas with white sclera: A naturally occurring variation in a morphological trait linked to social cognitive functions. *Am. J. Primatol.* 77, 869-877 (2015).
5. J.O. Perea-García, M.E. Kret, A. Monteiro, C. Hobaiter, Scleral pigmentation leads to conspicuous, not cryptic, eye morphology in chimpanzees. *Proc. Natl. Acad. Sci. U.S.A.* 116, 19248-19250 (2019).
6. M. Tomasello, B. Hare, H. Lehmann, J. Call, Reliance on head versus eyes in the gaze following of great apes and human infants: the cooperative eye hypothesis. *J. Hum. Evol.* 52, 314-320 (2007).
7. B. Hare, Survival of the friendliest: Homo sapiens evolved via selection for prosociality. *Annu. Rev. Psychol.*, 68, 155-186 (2017).
8. J.M. Burkart et al., The evolutionary origin of human hyper-cooperation. *Nat. Commun.* 5, 1-9 (2014).
9. J.O. Perea-García, K.R. Ehlers, K. Tylén, Bodily constraints contributing to multimodal referentiality in humans: The contribution of a de-pigmented sclera to proto-declaratives. *Lang. Commun.* 54, 73-81 (2017).
10. J.L. Yorzinski, C.A. Thorstenson, T.P. Nguyen, Sclera and Iris Color Interact to Influence Gaze Perception. *Front. Psychol.* 12, 676 (2021).
11. F. Kano, J. Call, Cross-species variation in gaze following and conspecific preference among great apes, human infants and adults. *Anim. Behav.* 91, 137-150 (2014).
12. A.G. Rosati, B. Hare, Looking past the model species: diversity in gaze-following skills across primates. *Curr. Opin. Neurobiol.* 19, 45-51 (2009).
13. S.V. Shepherd, Following gaze: gaze-following behavior as a window into social cognition. *Front. Integr. Neurosci.* 4, 5 (2010).
14. N.J. Emery, The eyes have it: the neuroethology, function and evolution of social gaze. *Neurosci. Biobehav. Rev.* 24, 581-604 (2000).
15. R. Watt, B. Craven, S. Quinn, S. A role for eyebrows in regulating the visibility of eye gaze direction. *Q. J. Exp. Psychol.* 60, 1169-1177 (2007).
16. A.S. Wilkins, R.W. Wrangham, W.T. Fitch, The "domestication syndrome" in mammals: a unified explanation based on neural crest cell behavior and genetics. *Genetics*, 197, 795-808 (2014).
17. K. Hall et al., Chimpanzee uses manipulative gaze cues to conceal and reveal information to foraging competitor. *Am. J. Primatol.* 79, e22622 (2017).
18. R.W. Byrne, Machiavellian intelligence. *Evolutionary Anthropology*, 5, 172-180 (1996).
19. J. Call, M. Tomasello, Does the chimpanzee have a theory of mind? 30 years later. *Human Nature and Self Design*, 83-96 (2011).

- 374 20. S. Hirata, T. Matsuzawa, Tactics to obtain a hidden food item in chimpanzee pairs (Pan  
375 troglodytes). *Anim. Cogn.*, 4(3-4), 285-295 (2001).
- 376 21. A.V. Jaeggi, J.M. Burkart, C.P. Van Schaik, On the psychology of cooperation in humans  
377 and other primates: combining the natural history and experimental evidence of  
378 prosociality. *Philos. Trans. R. Soc. B*, 365, 2723-2735 (2010).
- 379 22. G.R. Brown, R.E. Almond, Y.V. Bergen, "Begging, stealing, and offering: food transfer in  
380 nonhuman primates" in *Advances in The study of behavior*, P.J.B. Slater et al., Eds.  
381 (Elsevier Academic Press, 2004), pp. 265–295.
- 382 23. M. Tomasello, "A Natural History of Human Morality" (Harvard University Press, 2014).
- 383 24. M.L. Wilson et al., Lethal aggression in Pan is better explained by adaptive strategies  
384 than human impacts. *Nature*, 513, 414-417 (2014).
- 385 25. J.C. Mitani, D.P. Watts, S.J. Amsler, Lethal intergroup aggression leads to territorial  
386 expansion in wild chimpanzees. *Curr. Biol.* 20, R507-R508 (2010).
- 387 26. M.G. Talebi, R. Beltrão-Mendes, P.C. Lee, Intra-community coalitionary lethal attack of  
388 an adult male southern murrelet (*Brachyteles arachnoides*). *Am. J. Primat.* 71, 860-867  
389 (2009).
- 390 27. R.W. Wrangham, Two types of aggression in human evolution. *Proc. Natl. Acad. Sci.*  
391 *U.S.A.* 115, 245-253 (2018).
- 392 28. B. Hare, V. Wobber, R.W. Wrangham, The self-domestication hypothesis: evolution of  
393 bonobo psychology is due to selection against aggression. *Anim. Behav.* 83, 573-585  
394 (2012).
- 395 29. A.P. Melis, J. Call, M. Tomasello, Chimpanzees (Pan troglodytes) conceal visual and  
396 auditory information from others. *J. Comp. Psychol.* 120, 154 (2006).
- 397 30. P. Cerrito, A.R. DeCasien, The expression of care: alloparental care frequency predicts  
398 neural control of facial muscles in primates. *Evolution* (2021). 10.1111/evo.14275
- 399 31. F.M. Miss, J.M. Burkart, Corepresentation during joint action in marmoset monkeys  
400 (*Callithrix jacchus*). *Psychol. Sci.* 29, 984-995 (2018).
- 401 32. F. Miss, H. Meunier, J.M. Burkart, Primate origins of corepresentation and cooperative  
402 flexibility. *Cogn.* (in review)
- 403 33. S. Jessen, T. Grossmann, Unconscious discrimination of social cues from eye whites in  
404 infants. *Proc. Natl. Acad. Sci. U.S.A.* 111, 16208-16213 (2014).
- 405 34. A.S. Mearing, K. Koops, Quantifying gaze conspicuousness: Are humans distinct from  
406 chimpanzees and bonobos? *J. Hum. Evol.* 157, 103043 (2021).
- 407 35. J.M. Gómez, M. Verdú, A. González-Megías, M. Méndez, The phylogenetic roots of  
408 human lethal violence. *Nature*, 538, 233-237 (2016).
- 409 36. T.J. Bergman, J.C. Beehner, A simple method for measuring colour in wild animals:  
410 validation and use on chest patch colour in geladas (*Theropithecus gelada*). *Biol. J. Linn.*  
411 *Soc.* 94, 231-240 (2008).
- 412 37. J.O. Perea-García, Quantifying ocular morphologies in extant primates for reliable  
413 interspecific comparisons. *J. Lang. Evol.* 1, 151-158 (2016).
- 414 38. J.M. Burkart, C. van Schaik, Group service in macaques (*Macaca fuscata*), capuchins  
415 (*Cebus apella*) and marmosets (*Callithrix jacchus*): A comparative approach to  
416 identifying proactive prosocial motivations. *J. Comp. Psychol.* 127, 212 (2003).
- 417 39. C.A. Schneider, W.S. Rasband, K.W. Eliceiri, NIH Image to ImageJ: 25 years of image  
418 analysis. *Nat. Methods*, 9, 671-675 (2012).

- 419 40. R Core Team, R: A language and environment for statistical computing. R Foundation for  
420 Statistical Computing, Vienna, Austria. <https://www.R-project.org/>. (2020)  
421 41. D. Orme et al., caper: Comparative Analyses of Phylogenetics and Evolution in R. R  
422 package version 1.0.1. <https://CRAN.R-project.org/package=caper> (2018)  
423 42. C. Arnold, L.J. Matthews, C.L. Nunn, The 10kTrees website: a new online resource for  
424 primate phylogeny. *Evol. Anthropol.*, 19, 114-118 (2010).  
425 43. D.A. Benson, GenBank. *Nucleic Acids Res.* 41, D36-D42 (2012).  
426 44. J.P. Ekwaru, P.J. Veugelers, The overlooked importance of constants added in log  
427 transformation of independent variables with zero values: A proposed approach for  
428 determining an optimal constant. *Stat. Biopharm. Res.* 10, 26-29 (2018).  
429 45. M. Pagel, Inferring the historical patterns of biological evolution. *Nature*, 401, 877-884  
430 (1999).  
431 46. R.P. Freckleton, P.H. Harvey M. Pagel, Phylogenetic analysis and comparative data: a  
432 test and review of evidence. *Am. Nat.* 160, 212-226 (2015).  
433 47. T. Münkemüller et al., How to measure and test phylogenetic signal. *Methods Ecol. Evol.*  
434 3, 743-756 (2012).  
435 48. P. Carvalho, J.A.F. Diniz-Filho, L.M. Bini, Factors influencing changes in trait correlations  
436 across species after using phylogenetic independent contrasts. *Evol. Ecol.* 20, 591-602  
437 (2006).

438

439

## 440 Figures and Tables

441

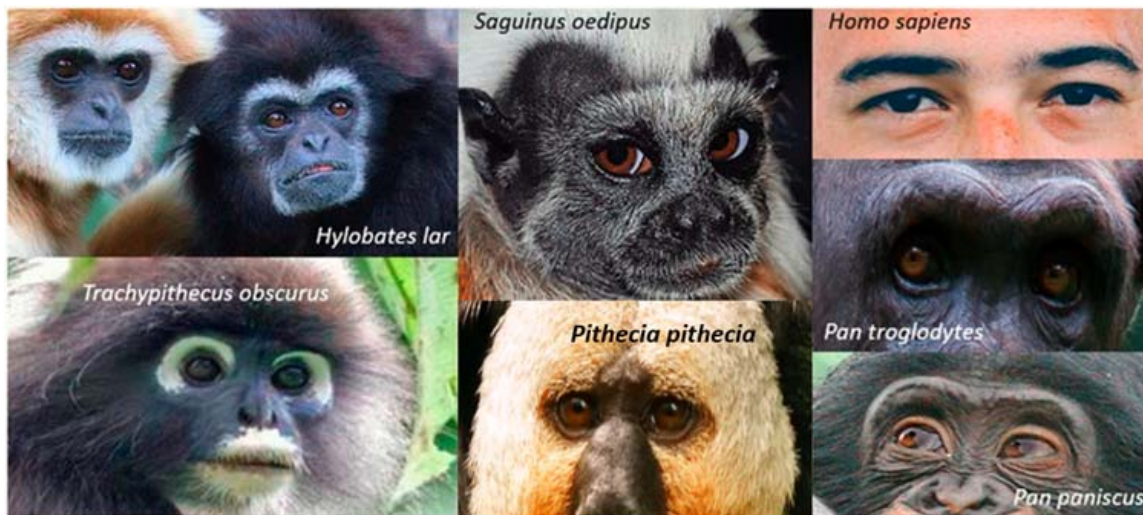

442

443

444 **Figure 1.** Ocular diversity in the primate order. All photos under creative commons license unless  
445 otherwise specified. *H. lar* credit to user: MatthiasKabel  
446 ([https://commons.wikimedia.org/wiki/Hylobatidae#/media/File:Hylobates\\_lar\\_pair\\_of\\_white\\_and\\_black\\_02.jpg](https://commons.wikimedia.org/wiki/Hylobatidae#/media/File:Hylobates_lar_pair_of_white_and_black_02.jpg)). *T. obscurus* credit to Lip Kee Yap  
447 ([https://commons.wikimedia.org/wiki/File:Trachypithecus\\_obscurus.jpg](https://commons.wikimedia.org/wiki/File:Trachypithecus_obscurus.jpg)). *S. oedipus* credit to  
448 Michael Gäbler ([https://en.m.wikipedia.org/wiki/File:Saguinus\\_oedipus\\_\(Linnaeus,\\_1758\).jpg](https://en.m.wikipedia.org/wiki/File:Saguinus_oedipus_(Linnaeus,_1758).jpg)). *P.*  
449 *pithecia* credit to Hans Hillewaert  
450 ([https://en.wikipedia.org/wiki/Pitheciidae#/media/File:Pithecia\\_pithecia.jpg](https://en.wikipedia.org/wiki/Pitheciidae#/media/File:Pithecia_pithecia.jpg)). *H. sapiens* photo is in  
451

452 *the public domain, credit to Fernanda Latronica (<https://www.pexels.com/photo/close-up->*  
453 *photography-of-bearded-man-713520/)*. *P. troglodytes* photo provided by the Royal Burgers' Zoo,  
454 *Netherlands. P. paniscus* credit to William H. Calvin  
455 ([https://commons.wikimedia.org/wiki/File:Bonobos\\_11yr\\_male\\_3yr\\_male\\_grin\\_Twycross.jpg](https://commons.wikimedia.org/wiki/File:Bonobos_11yr_male_3yr_male_grin_Twycross.jpg))  
456  
457

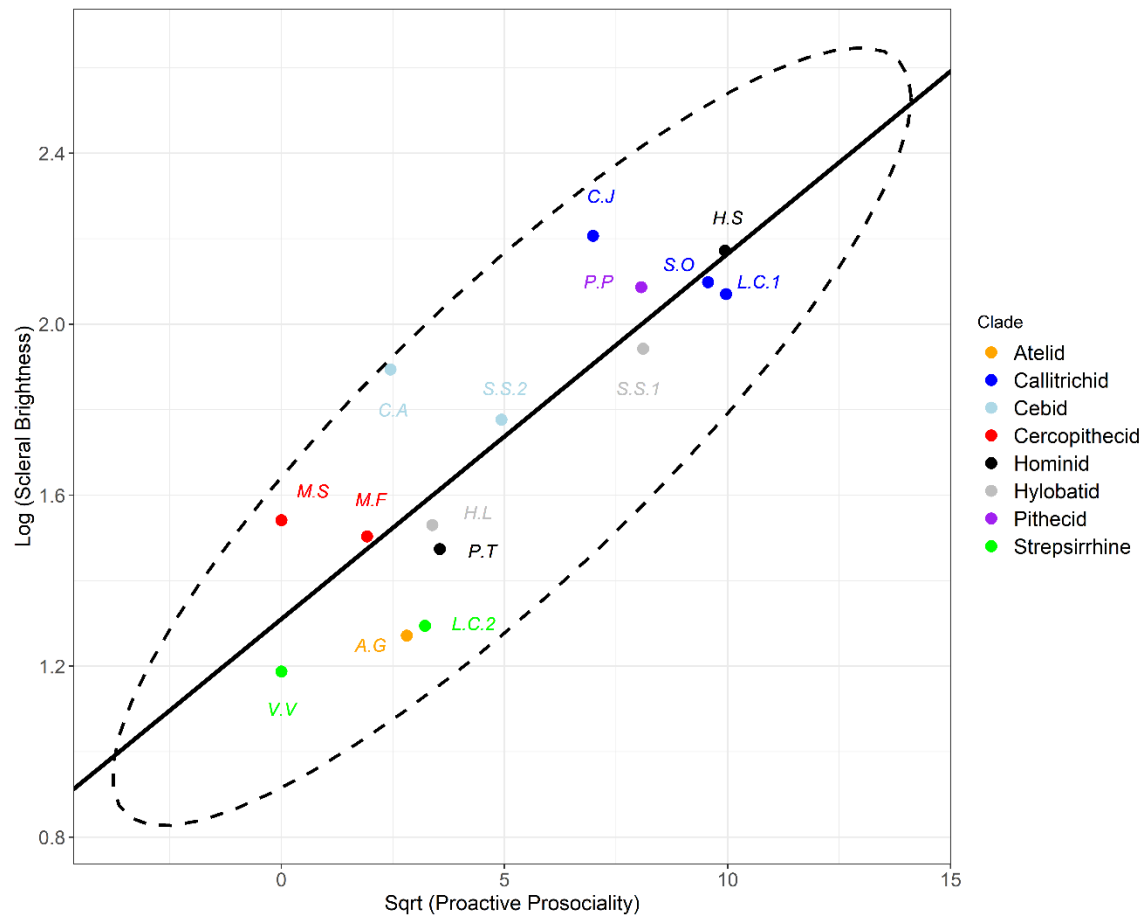

458  
459  
460  
461  
462  
463  
464  
465  
466  
467

**Figure 2.** PGLS regression plot comparing log (scleral brightness) with sqrt (proactive prosociality) with in  $n=15$  primate species. Confidence ellipse computed to 95% confidence. CJ = *Callithrix jacchus*; HS = *Homo sapiens*; SO = *Saguinus oedipus*; LC1 = *Leontopithecus chrysomelas*; PP = *Pithecia pithecia*; SS1 = *Symphalangus syndactylus*; SS2 = *Saimiri sciureus*; CA = *Cebus apella*; MS = *Macaca silenus*; MF = *Macaca fuscata*; HL = *Hylobates lar*; PT = *Pan troglodytes*; LC2 = *Lemur catta*; AG = *Ateles geoffroyi*; VV = *Varecia variegata*.

468

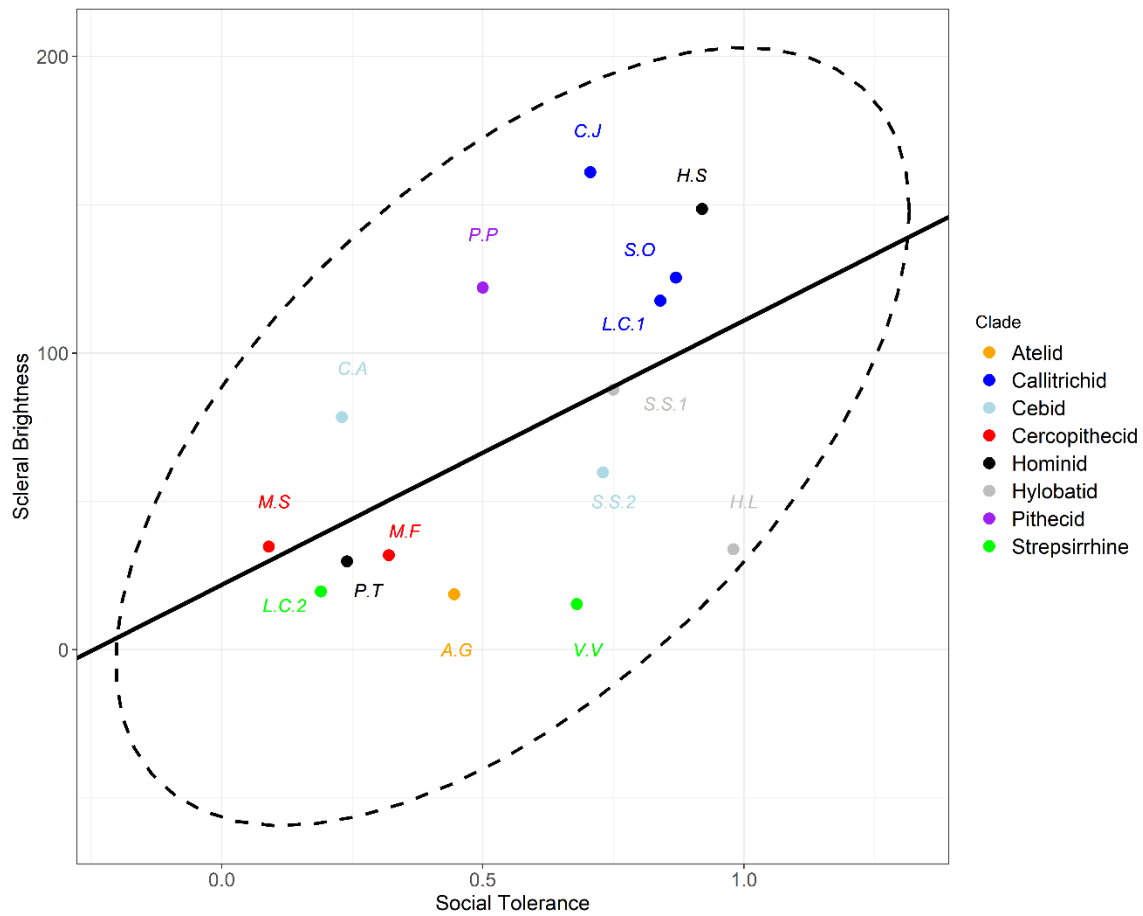

469

470

471

472

473

474

475

476

477

**Figure 3.** PGLS regression plot comparing scleral brightness with social tolerance scores in  $n=15$  primate species. Confidence ellipse computed to 95% confidence. C.J = *Callithrix jacchus*; H.S = *Homo sapiens*; S.O = *Saguinus oedipus*; LC1 = *Leontopithecus chrysomelas*; PP = *Pithecia pithecia*; SS1 = *Symphalangus syndactylus*; SS2 = *Saimiri sciureus*; CA = *Cebus apella*; MS = *Macaca silenus*; MF = *Macaca fuscata*; HL = *Hylobates lar*; PT = *Pan troglodytes*; LC2 = *Lemur catta*; AG = *Ateles geoffroyi*; VV = *Varecia variegata*.

478

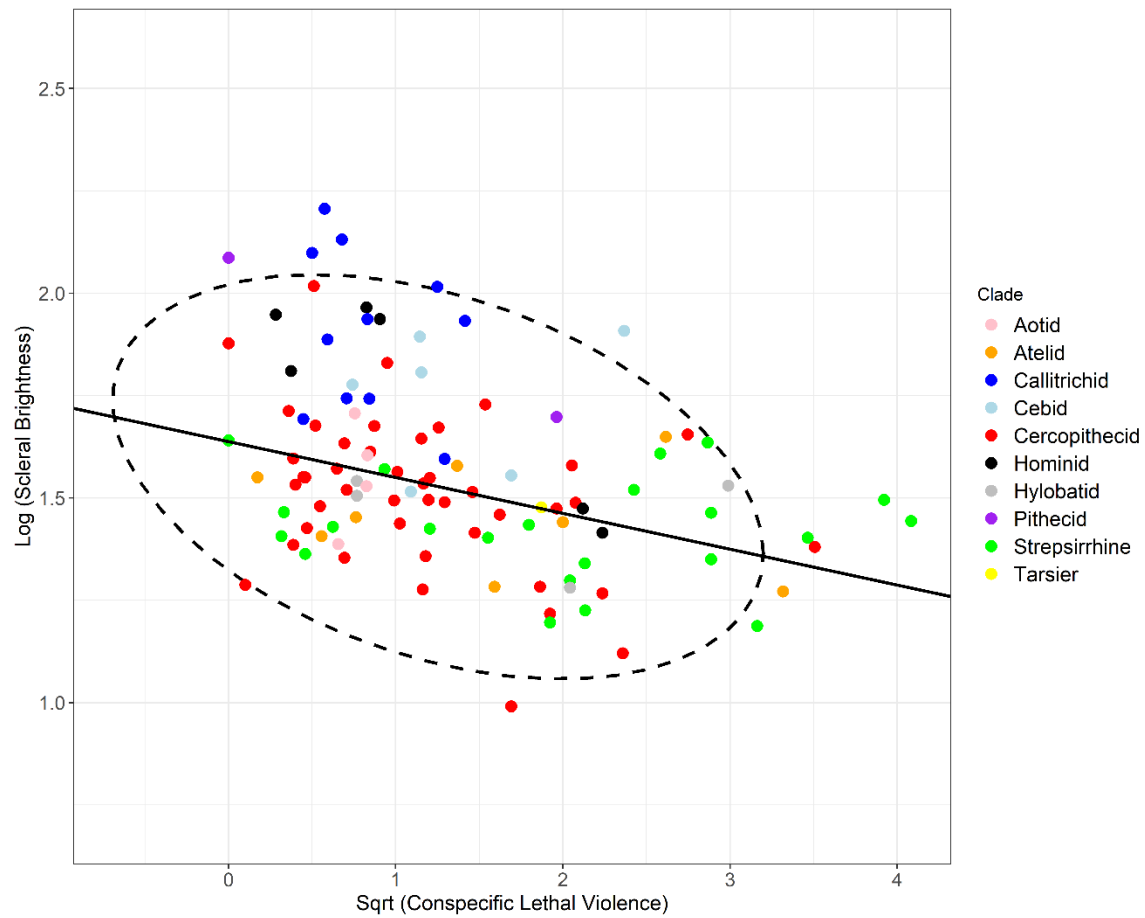

479  
480  
481  
482  
483  
484

**Figure 4.** PGLS regression plot comparing *log (scleral brightness)* with *sqrt (conspecific lethal violence)*. That is, the percentage of deaths due to conspecific lethal violence in  $n=108$  primate species. Confidence ellipse computed to 95% confidence indicating bivariate outliers.
